# Supplementary material for: Development of deep learning algorithms to discriminate giant cell tumors of bone from adjacent normal tissues by confocal Raman spectroscopy
Source: Royal Society of Chemistry journal article supplement (doi:10.1039/d1an01554k), 2022-01-01
Supplement: d1an01554k1.pdf [file d1an01554k1.pdf]

Supplementary Table 1

The differences between the performances obtained from the two approaches (data split by sample and by spectra respectively) are shown in the following table.

| Type of specimen (no. of sample) | Cross-validation (data splitting method) | Algorithm | Accuracy (%) | Sensitivity (%) | Specificity (%) | AUC   |
|----------------------------------|------------------------------------------|-----------|--------------|-----------------|-----------------|-------|
| FFPE (60)                        | <b>By sample</b>                         | PCA + SVM | 82.8         | 91.9            | 61.6            | 0.880 |
|                                  |                                          | LSTM      | 87.4         | 91.9            | 77.0            | 0.930 |
| Frozen (40)                      |                                          | PCA + KNN | 87.9         | 90.8            | 83.0            | 0.930 |
|                                  |                                          | LSTM      | 94.4         | 95.5            | 92.7            | 0.980 |
| FFPE (60)                        | <b>By spectra</b>                        | PCA + SVM | 90.7         | 97.2            | 75.6            | 0.950 |
|                                  |                                          | LSTM      | 93.5         | 96.2            | 87.2            | 0.970 |
| Frozen (40)                      |                                          | PCA + KNN | 96.5         | 98.0            | 94.0            | 0.960 |
|                                  |                                          | LSTM      | 98.1         | 98.6            | 97.3            | 0.999 |

Supplementary Table 2

| Tissue types    | Raman shifts | Assignments                                                                                                    |
|-----------------|--------------|----------------------------------------------------------------------------------------------------------------|
| Bone            | 857          | Amino acid side chain vibrations of proline and hydroxyproline, and a (C-C) vibration of the collagen backbone |
|                 | 961          | Phosphate symmetric stretching vibration of calcium hydroxyapatite                                             |
|                 | 1072         | Carbonate symmetric stretching vibration of calcium carbonate apatite                                          |
|                 | 1248         | Amide III (collagen assignment)                                                                                |
|                 | 1452         | CH <sub>2</sub> CH <sub>3</sub> deformation (collagen assignment)                                              |
|                 | 1663         | Proteins, including collagen I                                                                                 |
| Skeletal muscle | 622          | (C-C) twisting mode of phenylalanine (proteins)                                                                |
|                 | 755          | Symmetric breathing of tryptophan                                                                              |
|                 | 856          | Amino acid side chain vibrations of proline and hydroxyproline, and a (C-C) vibration of the collagen backbone |
|                 | 939          | Proline, hydroxyproline, $\nu$ (C-C) skeletal of collagen backbone                                             |
|                 | 1004         | Phenylalanine (of collagen)                                                                                    |
|                 | 1103         | Phenylalanine (proteins)                                                                                       |
|                 | 1245         | Amide III                                                                                                      |
|                 | 1342         | CH deformation (proteins and carbohydrates)                                                                    |
|                 | 1451         | CH <sub>2</sub> CH <sub>3</sub> deformation (collagen assignment)                                              |
|                 | 1548         | Tryptophan                                                                                                     |
| Adipose tissue  | 725          | Adenine (ring breathing mode of DNA/RNA bases)                                                                 |
|                 | 870          | Single bond stretching vibrations for the amino acid proline, valine and polysaccharides                       |
|                 | 972          | (C-C) backbone (collagen assignment)                                                                           |
|                 | 1083         | C-N stretching mode of proteins and lipid mode                                                                 |
|                 | 1303         | $\delta$ (CH <sub>2</sub> ) twisting, wagging, phospholipids (lipid assignment)                                |
|                 | 1441         | CH <sub>2</sub> scissoring & CH <sub>3</sub> bending in lipids                                                 |
|                 | 1657         | Fatty acids                                                                                                    |
| Blood cells     | 622          | (C-C) twisting mode of phenylalanine (proteins)                                                                |
|                 | 677          | $\nu_7, \delta$ (symmetric pyrrole deformation mode)                                                           |
|                 | 755          | $\nu_{15}, \nu$ (pyrrole breathing)                                                                            |
|                 | 827          | $\gamma_{10}, \gamma$ (C-H methine deformation)                                                                |
|                 | 940          | C-C stretch backbone                                                                                           |
|                 | 1003         | Phenylalanine, C-C skeletal                                                                                    |
|                 | 1128         | $\nu_5, \nu$ (C $_{\beta}$ -methyl)                                                                            |
|                 | 1224         | $\nu_{13}$ or $\nu_{42}, \delta$ (C-H methine deformation)                                                     |
|                 | 1342         | CH deformation (proteins and carbohydrates)                                                                    |
|                 | 1449         | $\delta$ (CH <sub>2</sub> /CH <sub>3</sub> )                                                                   |
|                 | 1564         | $\nu_{19}, \nu$ (C $_{\beta}$ C $_{\beta}$ )                                                                   |
|                 | 1621         | $\nu$ (C=C)vinyl                                                                                               |

Abbreviations:  $\nu$  &  $\delta$ : In-plane modes,  $\gamma$ : Out-of-plane modes.
